# Supplementary material for: Restoring Osteochondral Defects through the Differentiation Potential of Cartilage Stem/Progenitor Cells Cultivated on Porous Scaffolds
Source: MDPI journal article supplement (doi:10.3390/cells10123536), 2021-12-14

**Figure S1.** A schematic diagram of the studied design

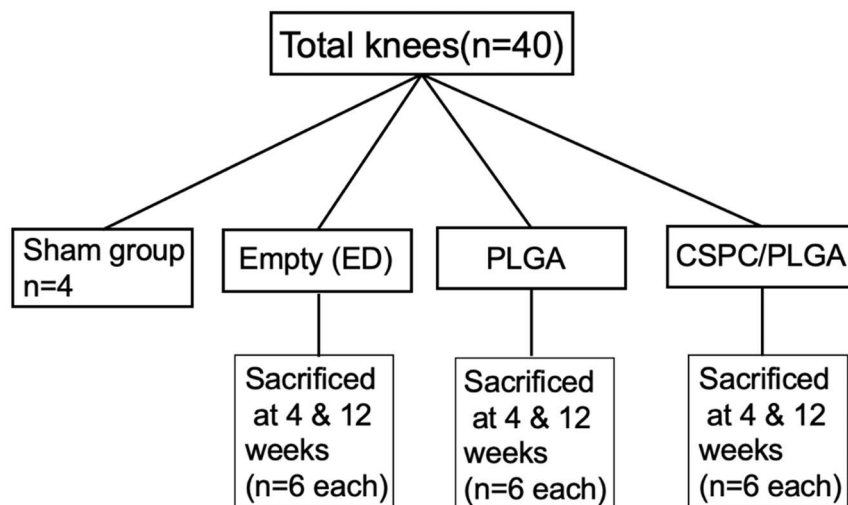

**Table S1:** A modified Wayne's grading scale scoring system for gross appearance

| Macroscopic Appearance    | Description                     | Points |
|---------------------------|---------------------------------|--------|
| 1. Coverage               | >75% fill                       | 4      |
|                           | 50-75% fill                     | 3      |
|                           | 25-50% fill                     | 2      |
|                           | <25% fill                       | 1      |
|                           | 0% fill                         | 0      |
| 2. Tissue Color           | Normal/whitish                  | 4      |
|                           | 25% yellow/brown/reddish/white  | 3      |
|                           | 50% yellow/brown/reddish/white  | 2      |
|                           | 75% yellow/brown/reddish/white  | 1      |
|                           | 100% yellow/brown/reddish/white | 0      |
| 3. Surface (smooth level) | Normal                          | 4      |
|                           | Smooth but raised               | 3      |
|                           | 25-50% irregular                | 2      |
|                           | 50-75% irregular                | 1      |
|                           | > 75% irregular                 | 0      |
| Total score               |                                 | 12     |

**Figure S2:** Proliferative potential of (A) chondrocytes or (B) osteoblasts cultured in extracellular vesicle (EV) derived medium from CSPCs or IFPs.

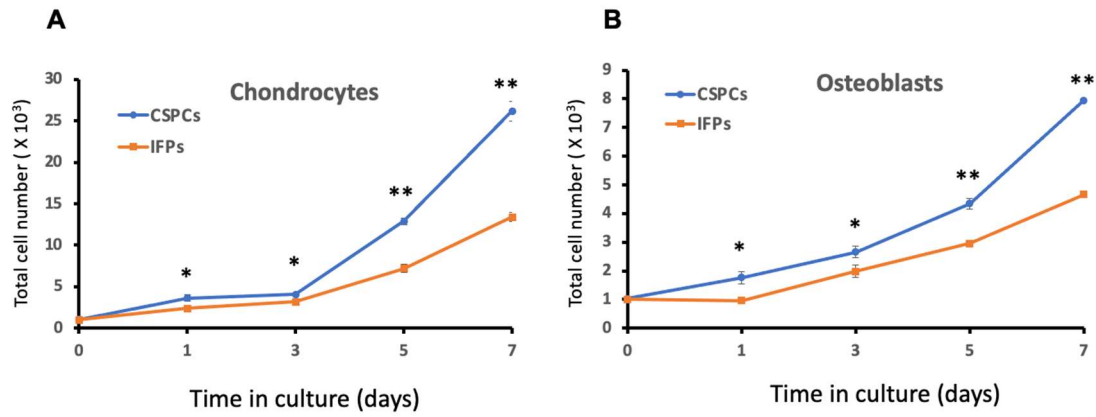

Supplement: s1 [file s1]
